# Supplementary material for: Validity and reliability of Psychiatric Nurse Self-Efficacy Scales: cross-sectional study
Source: HighWire-hosted journal article supplement (doi:10.1136/bmjopen-2021-055922), 2022-01-01
Supplement: bmjopen-2021-055922supp001_data_supplement.pdf [file bmjopen-2021-055922supp001_data_supplement.pdf]

**Appendix I: Gray highlights indicate Japanese translation.****Improved Self-Efficacy Scale (ISES: 自己効力感向上尺度)**

These questions ask about your present psychiatry department work. Please circle (○) the number that best matches your response.

現在のあなたの精神科でのお仕事についてうかがいます。あなたが最も当てはまると思う番号に○をつけてください。

| No | Question Item                                                                                                     | Not at all←            | →Yes |
|----|-------------------------------------------------------------------------------------------------------------------|------------------------|------|
| 1  | I feel that I can get words of appreciation from patients by being considerate.<br>私は、思いやることで患者からの感謝の言葉が得られると感じる。 | 0 1 2 3 4 5 6 7 8 9 10 |      |
| 2  | I feel that compassion makes smile of patients.<br>私は、思いやることで患者が笑顔になると感じる。                                        | 0 1 2 3 4 5 6 7 8 9 10 |      |
| 3  | I feel that I can get words of thanks from patients.<br>私は、患者からのお礼の言葉が得られると感じる。                                   | 0 1 2 3 4 5 6 7 8 9 10 |      |
| 4  | I feel that some patients are happy.<br>私は、患者の喜ぶ姿があると感じる。                                                         | 0 1 2 3 4 5 6 7 8 9 10 |      |
| 5  | I feel that the patient is satisfied.<br>私は、患者の満足している姿があると感じる。                                                    | 0 1 2 3 4 5 6 7 8 9 10 |      |
| 6  | I feel that the patient's mind is open.<br>私は、患者の心が開示されていると感じる。                                                   | 0 1 2 3 4 5 6 7 8 9 10 |      |
| 7  | I can predict the patient's symptoms.<br>私は、患者の症状に見通しをたてることができる。                                                  | 0 1 2 3 4 5 6 7 8 9 10 |      |
| 8  | I can foresee nursing.<br>私は、看護に見通しを立てることができる。                                                                    | 0 1 2 3 4 5 6 7 8 9 10 |      |
| 9  | I feel that I can make a right nursing decision.<br>私は、正しい看護判断ができると感じる。                                           | 0 1 2 3 4 5 6 7 8 9 10 |      |
| 10 | I can make use of my own experience of failure.<br>私は、自身の失敗経験をいかすことができる。                                          | 0 1 2 3 4 5 6 7 8 9 10 |      |
| 11 | I feel trust from my colleague nurses.<br>私は、同じ看護師から寄せられる信頼を感じる。                                                  | 0 1 2 3 4 5 6 7 8 9 10 |      |

Items 1-6: Positive changes in the patient (患者のポジティブな変化), Items 7-11: Prospect of Continuing in Psychiatric Nursing (精神科看護継続の見通し)

**Appendix II: Gray highlights indicate Japanese translation.****Decreased Self-Efficacy Scale (DSES: 自己効力感低下尺度)**

These questions ask about your present psychiatry department work. Please circle (○) the number that best matches your response.

現在のあなたの精神科でのお仕事についてうかがいます。あなたが最も当てはまると思う番号に○をつけてください。

| No | Question Item                                                                                             | Not at all←            | →Yes |
|----|-----------------------------------------------------------------------------------------------------------|------------------------|------|
| 1  | I feel that patients do not need me.<br>私は患者から必要とされていないと感じる。                                              | 0 1 2 3 4 5 6 7 8 9 10 |      |
| 2  | I have lost confidence in my attitude toward nursing.<br>私は、看護観に対する自信の喪失がある。                              | 0 1 2 3 4 5 6 7 8 9 10 |      |
| 3  | I feel that patients need other staff members than me.<br>私は、患者から自分よりも他のスタッフが必要とされていると感じる。                | 0 1 2 3 4 5 6 7 8 9 10 |      |
| 4  | I feel that nursing care is increasing due to the aging of patients.<br>私は患者の高齢化により介護が増加していると感じる。         | 0 1 2 3 4 5 6 7 8 9 10 |      |
| 5  | I feel a risk of violence from patients.<br>私は、患者からの暴力のリスクを感じる。                                           | 0 1 2 3 4 5 6 7 8 9 10 |      |
| 6  | I encounter the excitement of patients.<br>私は、患者の興奮に遭遇する。                                                 | 0 1 2 3 4 5 6 7 8 9 10 |      |
| 7  | I feel that I have little interaction with patients because of other work.<br>私は、他の業務のせいで患者との関わりが少ないと感じる。 | 0 1 2 3 4 5 6 7 8 9 10 |      |
| 8  | I do not feel the effectiveness of the care given to the patients.<br>私は、患者に行ったケアの有効性を感じない。               | 0 1 2 3 4 5 6 7 8 9 10 |      |
| 9  | I feel that the patient's symptoms have not improved.<br>私は、患者の症状の改善のなさを感じる。                              | 0 1 2 3 4 5 6 7 8 9 10 |      |
| 10 | I feel ambiguity about the treatment effect.<br>私は、治療効果にあいまいさを感じる。                                        | 0 1 2 3 4 5 6 7 8 9 10 |      |
| 11 | I feel uncertain about the patient's symptoms.<br>私は、患者の症状にあいまいさを感じる。                                     | 0 1 2 3 4 5 6 7 8 9 10 |      |

Items 1-3: Devaluation of own role as a psychiatric nurse (精神科看護師としての自身の役割のなさ), Items 4-7: Decrease in nursing ability due to overload (過重な負担による看護力の低下), Items 8 - 11: Difficulty in seeing any results from psychiatric nursing (精神科看護の結果を見ることの困難さ)

**Appendix III. The ISES and DSES score evaluation**

| Class<br>SD range                                          | Low<br>less than -1.5 | Slightly Low<br>less than -0.5 to -1.5 or<br>more | Mid-range<br>within $\pm 0.5$ | Slightly High<br>over 0.5 to less<br>than 1.5 | High<br>over 1.5 |
|------------------------------------------------------------|-----------------------|---------------------------------------------------|-------------------------------|-----------------------------------------------|------------------|
| Positive changes in the patient                            | 0-24                  | 25-32                                             | 33-41                         | 42-48                                         | 49-60            |
| Prospect of continuing in<br>psychiatric nursing           | 0-18                  | 19-24                                             | 25-30                         | 31-36                                         | 37-50            |
| <b>Improved Self-Efficacy Scale<br/>total</b>              | 0-46                  | 47-58                                             | 59-70                         | 71-82                                         | 83-110           |
| Devaluation of own role as a<br>psychiatric nurse          | 0-6                   | 7-11                                              | 12-16                         | 17-20                                         | 21-30            |
| Decrease in nursing ability due<br>to overload             | 0-18                  | 19-24                                             | 25-30                         | 31-35                                         | 36-40            |
| Difficulty in seeing any results in<br>psychiatric nursing | 0-13                  | 14-18                                             | 19-24                         | 25-29                                         | 30-40            |
| <b>Decreased Self-Efficacy Scale<br/>total</b>             | 0-48                  | 49-62                                             | 63-77                         | 78-91                                         | 92-120           |

*Note.* Each number means the range of scores. SD: Standard Deviation; ISES: Improved Self-Efficacy Scale; DSES: Decreased Self-Efficacy Scale.
